# Supplementary material
Source: PubMed Central journal article supplement (PMC3108556)
Supplement: supp_msq262_mbe-10-0577-File005.pdf [file supp_msq262_mbe-10-0577-File005.pdf]

Table S1. Results (mean, 95% HPDs, and root mean squared error (rMSE)) of leave-one-out analyses in which leaf ages were estimated for 85 Dengue sequences of known sample isolation time.

| Sequence ID       | <u>Years prior to most recent sample (2002)</u> |                          | <u>Year</u> |                         | rMSE        |
|-------------------|-------------------------------------------------|--------------------------|-------------|-------------------------|-------------|
|                   | True Age                                        | Mean (95% HPD)           | True Age    | Mean (95% HPD)          |             |
| D2MEXChochola02   | 0                                               | 1.36 (0.00-3.49)         | 2002        | 2001 (2002-1999)        | 1.75        |
| D2MEXOpichen02    | 0                                               | 2.00 (0.01-3.91)         | 2002        | 2000 (2002-1998)        | 2.27        |
| D2MEXTizimin02    | 0                                               | 0.66 (0.00-1.82)         | 2002        | 2001 (2002-2000)        | 0.89        |
| D2MEXOxkutzcab01  | 1                                               | 0.85 (0.00-2.08)         | 2001        | 2001 (2002-2000)        | 0.67        |
| D2MEXStElena01    | 1                                               | 1.22 (0.00-2.65)         | 2001        | 2001 (2002-1999)        | 0.80        |
| D2MEXTekax01      | 1                                               | 1.22 (0.00-2.69)         | 2001        | 2001 (2002-1999)        | 0.83        |
| D2Peru6658yr01    | 1                                               | 0.68 (0.00-1.86)         | 2001        | 2001 (2002-2000)        | 0.68        |
| D2Peru6663yr01    | 1                                               | 1.74 (0.00-3.72)         | 2001        | 2000 (2002-1998)        | 1.33        |
| D2ECa2000         | 2                                               | 1.75 (0.00-3.62)         | 2000        | 2000 (2002-1998)        | 1.06        |
| D2ECb2000         | 2                                               | 3.01 (0.72-5.58)         | 2000        | 1999 (2001-1996)        | 1.59        |
| D2GUY2000         | 2                                               | 1.14 (0.00-2.87)         | 2000        | 2001 (2002-1999)        | 1.23        |
| D2TRla2000        | 2                                               | 2.67 (0.03-4.70)         | 2000        | 1999 (2002-1997)        | 1.46        |
| D2TRlb2000        | 2                                               | 2.17 (0.00-4.82)         | 2000        | 2000 (2002-1997)        | 1.48        |
| D2Ven5942yr00     | 2                                               | 2.62 (0.79-4.46)         | 2000        | 1999 (2001-1998)        | 1.09        |
| D2Ven5952yr00     | 2                                               | 1.74 (0.01-3.32)         | 2000        | 2000 (2002-1999)        | 0.95        |
| D2Ven6045yr00     | 2                                               | 1.70 (0.00-3.14)         | 2000        | 2000 (2002-1999)        | 0.94        |
| Ven2000           | 2                                               | 1.27 (0.00-2.77)         | 2000        | 2001 (2002-1999)        | 1.10        |
| D2STLa1999        | 3                                               | 3.48 (1.54-4.91)         | 1999        | 1999 (2000-1997)        | 0.97        |
| D2STLb1999        | 3                                               | 4.04 (2.00-5.64)         | 1999        | 1998 (2000-1996)        | 1.38        |
| D2STLc1999        | 3                                               | 2.04 (0.00-4.13)         | 1999        | 2000 (2002-1998)        | 1.55        |
| <b>D2STLd1999</b> | <b>3</b>                                        | <b>0.94 (0.00-2.17)</b>  | <b>1999</b> | <b>2001 (2002-2000)</b> | <b>2.16</b> |
| D2SURb1999        | 3                                               | 3.05 (0.00-6.71)         | 1999        | 1999 (2002-1995)        | 2.07        |
| D2SURc1999        | 3                                               | 3.45 (1.26-5.70)         | 1999        | 1999 (2001-1996)        | 1.13        |
| D2SURd1999        | 3                                               | 2.34 (0.05-3.95)         | 1999        | 2000 (2002-1998)        | 1.19        |
| D2Ven4256yr99     | 3                                               | 2.87 (1.01-4.40)         | 1999        | 1999 (2001-1998)        | 0.84        |
| D2Ven4924yr99     | 3                                               | 2.06 (0.07-3.49)         | 1999        | 2000 (2002-1999)        | 1.31        |
| Ven1999           | 3                                               | 4.12 (1.36-6.51)         | 1999        | 1998 (2001-1995)        | 1.70        |
| D2BAR1998         | 4                                               | 3.07 (0.27-5.11)         | 1998        | 1999 (2002-1997)        | 1.57        |
| D2PRa1998         | 4                                               | 6.16 (1.90-10.59)        | 1998        | 1996 (2000-1991)        | 3.08        |
| D2PRb1998         | 4                                               | 6.05 (2.14-10.77)        | 1998        | 1996 (2000-1991)        | 3.01        |
| <b>D2STVa1998</b> | <b>4</b>                                        | <b>8.28 (5.34-11.20)</b> | <b>1998</b> | <b>1994 (1997-1991)</b> | <b>4.53</b> |
| D2STVb1998        | 4                                               | 4.45 (2.00-6.34)         | 1998        | 1998 (2000-1996)        | 1.16        |
| D2STVc1998        | 4                                               | 5.46 (2.40-8.08)         | 1998        | 1997 (2000-1994)        | 2.04        |
| D2Ven2213yr98     | 4                                               | 6.19 (3.61-8.55)         | 1998        | 1996 (1998-1993)        | 2.54        |
| D2Ven2303yr98     | 4                                               | 3.38 (0.86-5.28)         | 1998        | 1999 (2001-1997)        | 1.32        |

|                  |           |                            |             |                         |             |
|------------------|-----------|----------------------------|-------------|-------------------------|-------------|
| D2Ven2893yr98    | 4         | 4.44 (0.78-7.48)           | 1998        | 1998 (2001-1995)        | 1.79        |
| D2Ven2995yr98    | 4         | 3.49 (0.59-5.79)           | 1998        | 1999 (2001-1996)        | 1.44        |
| D2Ven3146yr98    | 4         | 7.41 (1.74-12.12)          | 1998        | 1995 (2000-1990)        | 4.27        |
| D2Mar1998        | 4         | 4.48 (0.02-7.85)           | 1998        | 1998 (2002-1994)        | 2.24        |
| <b>D2BOL1997</b> | <b>5</b>  | <b>9.11 (5.99-11.94)</b>   | <b>1997</b> | <b>1993 (1996-1990)</b> | <b>4.39</b> |
| D2TRI1997        | 5         | 4.37 (2.44-6.30)           | 1997        | 1998 (2000-1996)        | 1.15        |
| D2TRla1997       | 5         | 4.95 (3.08-6.73)           | 1997        | 1997 (1999-1995)        | 0.92        |
| D2TRib1997       | 5         | 4.09 (1.63-6.19)           | 1997        | 1998 (2000-1996)        | 1.44        |
| D2Ven1432yr97    | 5         | 4.92 (1.84-7.60)           | 1997        | 1997 (2000-1994)        | 1.43        |
| D2Ven1557yr97    | 5         | 3.91 (1.23-6.21)           | 1997        | 1998 (2001-1996)        | 1.66        |
| D2Ven1688yr97    | 5         | 4.54 (2.89-6.04)           | 1997        | 1997 (1999-1996)        | 0.93        |
| D2Ven1811yr97    | 5         | 3.95 (1.24-6.15)           | 1997        | 1998 (2001-1996)        | 1.64        |
| D2ARU1996        | 6         | 6.73 (1.13-11.58)          | 1997        | 1995 (2001-1990)        | 1.77        |
| D2CUR1996        | 6         | 7.01 (4.11-9.81)           | 1996        | 1995 (1998-1992)        | 2.43        |
| D2TRla1996       | 6         | 4.42 (0.52-7.53)           | 1996        | 1998 (2001-1994)        | 3.66        |
| D2TRib1996       | 6         | 8.92 (4.63-13.19)          | 1996        | 1993 (1997-1989)        | 1.65        |
| D2Ven1996yr97    | 6         | 6.19 (2.88-9.24)           | 1996        | 1996 (1999-1993)        | 2.75        |
| D2DOMa1995       | 7         | 7.50 (3.65-11.01)          | 1995        | 1995 (1998-1991)        | 1.96        |
| D2DOMb1995       | 7         | 7.43 (5.46-9.37)           | 1995        | 1995 (1997-1993)        | 1.04        |
| D2DOMc1995       | 7         | 6.37 (4.03-8.28)           | 1995        | 1996 (1998-1994)        | 1.23        |
| D2PRa1994        | 8         | 10.02 (5.61-14.09)         | 1994        | 1992 (1996-1988)        | 2.95        |
| D2PRb1994        | 8         | 7.07 (3.67-10.43)          | 1994        | 1995 (1998-1992)        | 1.90        |
| D2COL1993        | 9         | 11.06 (8.19-13.78)         | 1993        | 1991 (1994-1988)        | 2.51        |
| D2JCUR1993       | 9         | 8.79 (6.64-10.83)          | 1993        | 1993 (1995-1991)        | 1.08        |
| D2SURa1993       | 9         | 7.84 (5.46-10.15)          | 1993        | 1994 (1997-1992)        | 1.67        |
| D2SURb1993       | 9         | 8.76 (6.53-10.69)          | 1993        | 1993 (1995-1991)        | 1.08        |
| D2SURc1993       | 9         | 8.78 (6.62-10.71)          | 1993        | 1993 (1995-1991)        | 1.08        |
| D2SURd1993       | 9         | 7.41 (4.71-9.80)           | 1993        | 1995 (1997-1992)        | 2.07        |
| D2PRa1991        | 11        | 12.49 (8.32-16.03)         | 1991        | 1990 (1994-1986)        | 2.47        |
| D2PRb1991        | 11        | 12.48 (8.37-16.20)         | 1991        | 1990 (1994-1986)        | 2.48        |
| Bra1990          | 12        | 10.20 (6.95-13.67)         | 1990        | 1992 (1995-1988)        | 2.49        |
| <b>D2JDR1990</b> | <b>12</b> | <b>17.33 (13.33-20.79)</b> | <b>1990</b> | <b>1985 (1989-1981)</b> | <b>5.66</b> |
| D2VEN1990        | 12        | 13.45 (9.53-17.27)         | 1990        | 1989 (1992-1985)        | 2.46        |
| D2BAH1989        | 13        | 15.69 (12.62-18.75)        | 1989        | 1986 (1989-1983)        | 3.11        |
| D2TRI1989        | 13        | 11.19 (7.12-14.67)         | 1989        | 1991 (1995-1987)        | 2.66        |
| D2PRa1988        | 14        | 12.74 (9.15-16.80)         | 1988        | 1989 (1993-1985)        | 2.32        |
| D2PRb1988        | 14        | 11.33 (7.40-15.10)         | 1988        | 1991 (1995-1987)        | 3.31        |
| D2TRI1988        | 14        | 14.91 (12.27-18.02)        | 1988        | 1987 (1990-1984)        | 1.68        |
| D2BAR1987        | 15        | 14.10 (10.99-16.91)        | 1987        | 1988 (1991-1985)        | 1.77        |
| D2TRI1987        | 15        | 14.30 (12.12-16.38)        | 1987        | 1988 (1990-1986)        | 1.26        |
| D2JSUR1986       | 16        | 16.75 (14.80-19.03)        | 1986        | 1985 (1987-1983)        | 1.29        |
| D2JTRI1986       | 16        | 15.97 (12.35-19.03)        | 1986        | 1986 (1990-1983)        | 1.71        |
| D2PRa1986        | 16        | 22.13 (13.41-33.01)        | 1986        | 1980 (1989-1969)        | 8.62        |
| D2PRb1986        | 16        | 14.29 (10.13-18.30)        | 1986        | 1988 (1992-1984)        | 2.71        |
| D2SURa1986       | 16        | 15.45 (12.78-17.45)        | 1986        | 1987 (1989-1985)        | 1.28        |

|                  |           |                            |             |                         |             |
|------------------|-----------|----------------------------|-------------|-------------------------|-------------|
| D2SURb1986       | 16        | 17.03 (14.73-19.47)        | 1986        | 1985 (1987-1983)        | 1.58        |
| D2SURc1986       | 16        | 17.84 (13.11-25.09)        | 1986        | 1984 (1989-1977)        | 3.29        |
| D2TRla1986       | 16        | 16.16 (12.36-19.53)        | 1986        | 1986 (1990-1982)        | 2.13        |
| D2TRlb1986       | 16        | 16.01 (12.49-19.45)        | 1986        | 1986 (1990-1983)        | 1.75        |
| D2TRlc1986       | 16        | 16.74 (13.57-19.72)        | 1986        | 1985 (1988-1982)        | 1.72        |
| <b>D2DR1984</b>  | <b>18</b> | <b>9.48 (5.96-12.74)</b>   | <b>1984</b> | <b>1993 (1996-1989)</b> | <b>8.70</b> |
| <b>D2JAM1983</b> | <b>19</b> | <b>25.02 (19.16-31.58)</b> | <b>1983</b> | <b>1977 (1983-1970)</b> | <b>6.68</b> |
| Jam1981          | 21        | 23.45 (18.82-28.54)        | 1981        | 1979 (1983-1973)        | 3.49        |
