# Supplementary material
Source: PubMed Central journal article supplement (PMC3108556)
Supplement: supp_msq262_mbe-10-0577-File006.pdf [file supp_msq262_mbe-10-0577-File006.pdf]

Table S2. Results (mean, 95% HPDs, and root mean squared error (rMSE) of leave-one-out analyses in which leaf ages were estimated for 125 bison sequences of known sample isolation time. Analyses were performed using two different coalescent priors: the multi-change point (MCP) process (Drummond et al 2005), and the Gaussian Markov Random Field (GMRF; Minin et al 2008).

| Sequence ID | True Age<br>(calendar years) | GMRF<br>Mean (95% HPD) | GMRF<br>rMSE | MCP<br>Mean (95% HPD) | MCP<br>rMSE |
|-------------|------------------------------|------------------------|--------------|-----------------------|-------------|
| BS102       | 22 ± 5                       | 2344 (0-5689)          | 2916.76      | 2499 (1-6251)         | 3134.32     |
| BS99        | 26 ± 5                       | 1518 (1-4432)          | 2313.11      | 1346 (1-3929)         | 1888.20     |
| BS100       | 29 ± 5                       | 1633 (0-4656)          | 2205.87      | 1616 (0-4636)         | 2232.62     |
| BS200       | 145 ± 37                     | 4835 (2-9918)          | 5578.41      | 4700 (2-9575)         | 5363.92     |
| BS175       | 189 ± 90                     | 3364 (8-6137)          | 3553.66      | 3337 (6-6171)         | 3539.46     |
| BS424       | 216 ± 86                     | 3599 (3-7837)          | 4090.90      | 3628 (1-7996)         | 4167.17     |
| BS434       | 715 ± 26                     | 3271 (0-7428)          | 3417.97      | 3133 (2-7056)         | 3268.64     |
| BS422       | 822 ± 52                     | 3425 (1-7523)          | 3468.82      | 3552 (8-7871)         | 3624.22     |
| BS417       | 823 ± 51                     | 3535 (2-8197)          | 3718.20      | 3237 (0-7428)         | 3323.54     |
| BS441       | 1220 ± 44                    | 5696 (11-10836)        | 5522.14      | 5911 (57-10795)       | 5633.63     |
| BS123       | 1638 ± 77                    | 4407 (8-9486)          | 3888.39      | 4602 (9-9441)         | 4002.32     |
| BS289       | 2179 ± 70                    | 4045 (14-8932)         | 3172.84      | 4316 (18-8999)        | 3334.82     |
| BS490       | 2420 ± 75                    | 2792 (1-7270)          | 2417.19      | 2770 (1-7132)         | 2313.62     |
| BS198       | 2534 ± 113                   | 4295 (20-9429)         | 3227.93      | 4449 (13-9386)        | 3304.54     |
| BS517       | 2669 ± 71                    | 3312 (1-8320)          | 2607.77      | 3405 (3-8120)         | 2618.04     |
| BS503       | 2863 ± 42                    | 4313 (0-9406)          | 3056.98      | 4457 (6-9308)         | 3109.68     |
| BS560       | 2898 ± 36                    | 4815 (1-10000)         | 3544.64      | 4684 (2-9565)         | 3364.95     |
| BS177       | 3376 ± 30                    | 3647 (0-12176)         | 4541.29      | 3606 (0-13068)        | 4765.31     |
| BS173       | 3433 ± 45                    | 1697 (0-4794)          | 2297.92      | 1621 (0-4627)         | 2342.36     |
| BS569       | 3903 ± 93                    | 10513 (1035-20385)     | 8248.62      | 9713 (501-17841)      | 7267.37     |
| BS414       | 5155 ± 126                   | 9337 (856-17317)       | 6035.76      | 8768 (363-16127)      | 5602.64     |
| BS423       | 5387 ± 58                    | 10838 (298-20692)      | 7578.71      | 9823 (609-18331)      | 6340.01     |
| BS439       | 6658 ± 49                    | 4849 (0-10026)         | 3495.74      | 4638 (2-9440)         | 3453.97     |
| BS222       | 6977 ± 65                    | 11967 (3732-19685)     | 6388.61      | 11293 (3451-18888)    | 5755.19     |
| BS148       | 7326 ± 56                    | 14091 (8284-20545)     | 7388.16      | 13965 (8364-19833)    | 7159.78     |
| BS429       | 7620 ± 31                    | 5847 (13-11046)        | 3726.04      | 5708 (4-10806)        | 3690.95     |
| BS426       | 7898 ± 47                    | 5908 (6-11103)         | 3834.04      | 5559 (8-10675)        | 3930.14     |
| BS428       | 7936 ± 37                    | 5647 (4-10848)         | 3970.31      | 5681 (3-10672)        | 3874.89     |
| BS432       | 8126 ± 56                    | 9758 (37-19827)        | 5742.60      | 8658 (6-18338)        | 5314.73     |
| BS419       | 8309 ± 54                    | 5652 (3-10922)         | 4214.45      | 5517 (5-10652)        | 4232.94     |
| BS421       | 9068 ± 59                    | 10740 (725-21083)      | 5643.81      | 9898 (118-18856)      | 5038.34     |
| BS130       | 10124 ± 336                  | 16268 (4838-29927)     | 9062.21      | 15144 (4519-27715)    | 8061.16     |
| BS321       | 10773 ± 101                  | 12875 (681-25849)      | 7253.16      | 11707 (278-23891)     | 6641.60     |
| BS254       | 11969 ± 101                  | 9274 (815-15459)       | 4688.87      | 8966 (926-14591)      | 4696.70     |
| BS342       | 12142 ± 84                   | 7109 (2-17919)         | 7550.87      | 6498 (0-18245)        | 8254.76     |
| BS337       | 12219 ± 95                   | 9034 (791-15065)       | 4913.22      | 8964 (713-14167)      | 4806.98     |
| BS433       | 12368 ± 110                  | 10503 (633-20223)      | 5519.40      | 9491 (1139-18529)     | 5326.91     |
| BS202       | 12381 ± 120                  | 80369 (47807-107000)   | 69509.57     | 82771 (19936-119000)  | 73996.76    |
| BS348       | 12458 ± 69                   | 9594 (24-20034)        | 6285.93      | 8150 (15-17488)       | 6552.76     |
| BS297       | 12867 ± 53                   | 62262 (41667-79291)    | 50304.27     | 64290 (42197-83495)   | 52424.14    |

|       |             |                      |          |                        |           |
|-------|-------------|----------------------|----------|------------------------|-----------|
| BS237 | 13078 ± 74  | 19361 (5889-38408)   | 11007.72 | 18113 (5416-35227)     | 9597.97   |
| BS570 | 13158 ± 281 | 10166 (932-20190)    | 5840.13  | 9149 (50-17702)        | 6073.52   |
| BS146 | 13662 ± 58  | 60806 (28641-89428)  | 49661.15 | 65235 (20633-107000)   | 56790.93  |
| BS124 | 13734 ± 67  | 21959 (2516-43416)   | 13364.80 | 19762 (3868-36975)     | 10322.16  |
| BS145 | 14064 ± 82  | 9157 (2301-15531)    | 5904.83  | 8908 (2351-14510)      | 6011.56   |
| BS176 | 14232 ± 129 | 46145 (23488-68808)  | 33928.31 | 52947 (21632-83714)    | 41890.57  |
| BS318 | 14287 ± 125 | 31173 (12241-51876)  | 19841.62 | 31212 (12061-52840)    | 20086.39  |
| BS311 | 14318 ± 121 | 17679 (7841-29019)   | 6454.58  | 17594 (6474-28793)     | 6613.55   |
| IB179 | 14407 ± 172 | 33789 (12593-60406)  | 23236.85 | 42109 (13656-73671)    | 32313.31  |
| BS172 | 14530 ± 155 | 20590 (10896-30327)  | 7960.99  | 20574 (9825-31591)     | 8367.85   |
| BS253 | 14753 ± 112 | 8530 (1769-14766)    | 7051.23  | 8266 (2058-14140)      | 7202.35   |
| BS261 | 15046 ± 120 | 16259 (6277-27113)   | 5282.64  | 16331 (6721-27588)     | 5402.89   |
| BS201 | 15098 ± 116 | 18331 (9967-28518)   | 5716.41  | 18154 (9720-27892)     | 5617.58   |
| BS170 | 15189 ± 126 | 16323 (6602-27054)   | 5153.28  | 16341 (6715-27872)     | 5267.20   |
| BS224 | 15286 ± 132 | 21494 (5980-44685)   | 11760.70 | 21952 (6705-45715)     | 12286.90  |
| BS163 | 15418 ± 135 | 13782 (1677-23994)   | 5866.62  | 13711 (1933-24985)     | 6000.93   |
| BS233 | 19815 ± 112 | 43278 (15012-73436)  | 28234.31 | 94664 (14292-227000)   | 102688.85 |
| BS389 | 20337 ± 87  | 52175 (34999-72762)  | 33039.52 | 52238 (33254-75360)    | 33402.84  |
| BS178 | 21306 ± 158 | 44161 (14030-71246)  | 27670.81 | 47355 (15060-75730)    | 31092.23  |
| BS126 | 22778 ± 353 | 37012 (12953-66852)  | 20362.96 | 51577 (8098-183000)    | 56085.11  |
| BS121 | 23050 ± 392 | 24629 (11877-40138)  | 7522.79  | 25341 (11514-43868)    | 8725.61   |
| BS196 | 23123 ± 196 | 64575 (30175-94040)  | 44762.48 | 66860 (28657-102000)   | 47602.10  |
| BS236 | 23123 ± 196 | 44743 (16184-73370)  | 26417.95 | 48044 (16295-80701)    | 30216.12  |
| BS164 | 23319 ± 207 | 24175 (11670-38017)  | 6976.78  | 25164 (11416-44207)    | 8685.32   |
| BS107 | 23338 ± 405 | 51438 (20677-78048)  | 31899.22 | 53682 (18345-87785)    | 35828.90  |
| BS359 | 23916 ± 185 | 39958 (16543-64728)  | 20488.07 | 41767 (14653-66145)    | 22520.48  |
| BS605 | 24283 ± 104 | 47815 (18104-77142)  | 28241.46 | 72476 (13776-181000)   | 67111.85  |
| BS109 | 24752 ± 474 | 27720 (9832-48182)   | 10523.55 | 28203 (9259-49460)     | 11569.79  |
| BS108 | 25148 ± 507 | 28424 (10593-49905)  | 10803.06 | 28656 (10556-51123)    | 11520.94  |
| BS161 | 25181 ± 176 | 70688 (36052-101000) | 48412.09 | 80242 (30538-125000)   | 60263.59  |
| BS111 | 25920 ± 503 | 16566 (8826-25075)   | 10216.70 | 16373 (8823-25628)     | 10469.05  |
| BS258 | 26606 ± 184 | 31004 (8346-59351)   | 14280.13 | 207000 (106000-334000) | 189476.65 |
| BS405 | 27653 ± 195 | 78249 (41825-112000) | 53483.55 | 124000 (48004-208000)  | 105031.42 |
| BS396 | 28375 ± 237 | 32909 (15949-49105)  | 9727.65  | 33349 (13818-52123)    | 11111.66  |
| BS206 | 28487 ± 208 | 33547 (13110-56186)  | 12463.83 | 34484 (12593-60574)    | 14172.79  |
| BS340 | 29303 ± 251 | 59438 (22925-84630)  | 34087.53 | 64378 (22471-96745)    | 40138.01  |
| BS564 | 29377 ± 158 | 56807 (23517-84011)  | 31619.04 | 63105 (17915-97952)    | 40852.05  |
| BS498 | 31210 ± 284 | 43411 (21055-64489)  | 16490.91 | 47330 (22975-71536)    | 20537.50  |
| BS244 | 31459 ± 232 | 31530 (17626-45120)  | 6511.12  | 32385 (17070-47474)    | 7455.69   |
| BS192 | 31555 ± 353 | 40346 (22281-57108)  | 12342.41 | 40179 (19355-58652)    | 13005.73  |
| BS165 | 31728 ± 228 | 31174 (18080-45000)  | 6466.17  | 32396 (17628-48767)    | 7689.35   |
| BS418 | 31830 ± 741 | 47715 (18702-75062)  | 21639.06 | 48607 (15368-76548)    | 24890.54  |
| BS329 | 32370 ± 256 | 67021 (40663-91504)  | 36984.46 | 70817 (43050-97395)    | 40719.53  |
| BS398 | 32732 ± 317 | 86951 (63479-108000) | 55434.65 | 99544 (60419-143000)   | 69836.38  |
| BS388 | 32933 ± 336 | 85768 (49700-114000) | 55260.38 | 118000 (52790-179000)  | 90526.79  |
| BS147 | 33491 ± 340 | 55058 (17241-86626)  | 29037.80 | 56642 (16601-95587)    | 32221.89  |
| BS195 | 34450 ± 377 | 37953 (13399-62823)  | 13674.61 | 40310 (15294-66732)    | 15147.54  |
| BS674 | 34474 ± 197 | 45003 (23537-67965)  | 15629.72 | 47562 (23062-75273)    | 18722.37  |

|       |              |                      |          |                       |          |
|-------|--------------|----------------------|----------|-----------------------|----------|
| BS262 | 34559 ± 528  | 32285 (12990-54100)  | 11130.05 | 32478 (12258-55491)   | 11802.50 |
| BS660 | 34923 ± 193  | 45537 (24450-71874)  | 16156.83 | 46647 (23506-74660)   | 17631.96 |
| BS495 | 34987 ± 363  | 73148 (25846-108000) | 44151.22 | 109000 (24823-179000) | 84494.79 |
| BS497 | 35399 ± 537  | 45787 (17448-72157)  | 17863.45 | 47259 (17174-76286)   | 19583.67 |
| BS412 | 35875 ± 270  | 41301 (23644-60667)  | 10513.28 | 43245 (23532-65259)   | 12605.40 |
| BS260 | 36116 ± 312  | 29374 (8659-56572)   | 14442.26 | 35873 (9119-71799)    | 18709.04 |
| BS415 | 36194 ± 976  | 41600 (19680-65750)  | 12989.77 | 45655 (18776-69159)   | 16251.12 |
| BS713 | 36331 ± 219  | 45474 (13057-83839)  | 22055.54 | 99297 (13124-234000)  | 92187.58 |
| BS499 | 36784 ± 452  | 38126 (14268-63659)  | 12805.82 | 41090 (13989-68452)   | 14882.04 |
| BS327 | 36904 ± 276  | 31414 (16373-47873)  | 9610.66  | 32277 (14672-49868)   | 10193.43 |
| BS397 | 37762 ± 498  | 55707 (24128-82207)  | 23186.70 | 77427 (19583-142000)  | 51251.73 |
| BS387 | 38708 ± 551  | 73520 (33874-104000) | 39061.87 | 94040 (21708-161000)  | 64321.30 |
| BS477 | 39089 ± 277  | 40131 (16243-67946)  | 14092.41 | 41243 (13654-67423)   | 16425.32 |
| BS478 | 39836 ± 261  | 17416 (2988-32063)   | 23567.41 | 18784 (3171-36834)    | 22853.03 |
| BS395 | 40700 ± 1300 | 37826 (14328-64497)  | 13322.42 | 40474 (13333-68490)   | 14654.45 |
| BS500 | 40878 ± 529  | 43211 (16075-68856)  | 13464.06 | 45048 (15772-71643)   | 15136.45 |
| BS292 | 40991 ± 686  | 67453 (43506-91413)  | 29163.64 | 70453 (42618-94697)   | 32237.09 |
| BS392 | 41536 ± 712  | 37821 (16392-62268)  | 12722.54 | 39719 (13844-65140)   | 13914.45 |
| BS394 | 42528 ± 788  | 55609 (30035-80499)  | 18161.17 | 60865 (28021-88257)   | 24002.67 |
| BS243 | 42608 ± 385  | 29612 (9889-57205)   | 18080.87 | 36723 (4147-76072)    | 37078.57 |
| BS323 | 42831 ± 370  | 43756 (20263-65046)  | 11720.88 | 45313 (20256-69328)   | 12975.86 |
| BS350 | 43597 ± 885  | 41623 (16444-66507)  | 13008.73 | 44959 (16332-71568)   | 14314.01 |
| BS364 | 43685 ± 971  | 60618 (18727-91878)  | 26934.98 | 64213 (20572-102000)  | 30338.28 |
| BS345 | 44554 ± 1062 | 35409 (19905-54593)  | 12533.67 | 38158 (19439-62476)   | 12462.95 |
| BS393 | 44598 ± 1063 | 39138 (21487-58725)  | 11008.18 | 40383 (20162-61913)   | 11422.48 |
| BS281 | 45428 ± 564  | 39993 (14729-67010)  | 15188.38 | 42816 (12723-73341)   | 23336.62 |
| BS592 | 46908 ± 440  | 38063 (15865-60184)  | 14750.53 | 39096 (16067-62754)   | 14776.98 |
| BS235 | 47663 ± 812  | 36380 (14631-59214)  | 16383.77 | 37429 (14017-60167)   | 16077.38 |
| BS149 | 49975 ± 3033 | 44888 (13289-69531)  | 16934.96 | 50810 (13681-74558)   | 16720.17 |
| BS400 | 50204 ± 3427 | 21796 (12297-33451)  | 28965.41 | 21807 (11094-33915)   | 29105.12 |
| BS708 | 50652 ± 2042 | 36799 (18013-56546)  | 16932.78 | 38420 (18684-64788)   | 16732.63 |
| BS365 | 51433 ± 4004 | 29187 (11700-46697)  | 24107.90 | 28916 (11986-47484)   | 24432.21 |
| BS216 | 51433 ± 4004 | 47092 (16286-70604)  | 15743.19 | 49580 (13207-74804)   | 17226.90 |
| BS286 | 54134 ± 2800 | 83049 (64269-102000) | 30465.46 | 90412 (66629-116000)  | 38401.43 |
| BS320 | 54524 ± 3181 | 54926 (24497-80546)  | 14702.55 | 58260 (24708-88449)   | 17007.20 |
| BS291 | 54640 ± 3130 | 57076 (22244-83109)  | 16466.27 | 60653 (24841-90550)   | 17640.78 |
| BS493 | 55182 ± 5568 | 33422 (14301-53997)  | 24162.26 | 33857 (13411-56696)   | 24395.63 |
